# Supplementary material for: Plants and endophytes interaction: a “secret wedlock” for sustainable biosynthesis of pharmaceutically important secondary metabolites
Source: Springer Nature journal article supplement (doi:10.1186/s12934-023-02234-8), 2023-11-04
Supplement: 12934_2023_2234_MOESM1_ESM.pdf [file 12934_2023_2234_MOESM1_ESM.pdf]

### Additional File 1

**Table S1.** List of beneficial endophytic microbes associated with various medicinal plants and their plant growth promoting (PGP) and antimicrobial properties

| S. No. | Endophytes                                                                                                                                                                                                               | Host Plant                | Plant Part | PGP/ Antimicrobial Properties                                                                                     | References |
|--------|--------------------------------------------------------------------------------------------------------------------------------------------------------------------------------------------------------------------------|---------------------------|------------|-------------------------------------------------------------------------------------------------------------------|------------|
| 1.     | <i>Bacillus cereus</i> and <i>B.subtilis</i>                                                                                                                                                                             | <i>Teucrium polium</i> L. | Leaves     | Production of indole-3- acetic acid (IAA), ammonia and phosphate solubilization trait                             | [50]       |
| 2.     | <i>B. subtilis</i> , <i>Agrobacterium tumefaciens</i> , <i>Bacillus</i> sp., <i>Pseudomonas putida</i> , and <i>Pseudomonas</i> sp.                                                                                      | <i>Casia tora</i>         | Root       | Synthesis of IAA, ammonia, siderophores, HCN and solubilization of phosphate                                      | [51]       |
| 3.     | <i>Paenibacillus</i> sp.                                                                                                                                                                                                 | <i>Tridax procumbens</i>  | Root       | Production of secondary metabolites, IAA, siderophores, ACC deaminase, biosurfactant and phosphate solubilization | [52]       |
| 4.     | <i>B. cereus</i> (ECL1), <i>B. thuringiensis</i> (ECL2), <i>Bacillus</i> sp. (ECL3), <i>B. pumilis</i> (ECL4), <i>P. putida</i> (ECL5), and <i>Clavibacter michiganensis</i> (ECL6)<br><i>Achromobacter xiloxidans</i> , | <i>Curcuma longa</i> L.   | Rhizome    | Production of IAA, siderophore and phosphate solubilization                                                       | [53, 54]   |

|     |                                                                                                                                                                                                      |                               |                     |                                                                                                                            |      |
|-----|------------------------------------------------------------------------------------------------------------------------------------------------------------------------------------------------------|-------------------------------|---------------------|----------------------------------------------------------------------------------------------------------------------------|------|
|     | <i>Alcaligenes</i> sp.,<br><i>Bacillus pumilus</i>                                                                                                                                                   |                               |                     |                                                                                                                            |      |
|     | <i>Enterobacter</i> sp.,<br><i>Rahnella</i> sp.,<br><i>Rhodanobacter</i> sp.,<br><i>Pseudomonas</i> sp.,<br><i>Stenotrophomonas</i> sp.,<br><i>Xanthomonas</i> sp. and<br><i>Phyllobacterium</i> sp. | <i>Ipomoea batatas</i> L.     | Stem                | Production of IAA, nitrogen fixation and stress tolerance                                                                  | [55] |
| 5.  | <i>B. subtilis</i> and <i>B. thuringiensis</i>                                                                                                                                                       | <i>Glycine max</i> L.         | Seed                | Increase in nodule number per plant, increased soybean weight                                                              | [56] |
| 6.  | <i>Pseudomonas</i> sp.                                                                                                                                                                               | <i>Zingiber officinale</i>    | Rhizome             | IAA, ACC deaminase and siderophore production                                                                              | [57] |
| 7.  | <i>Achromobacter xiloxidans</i> ;<br><i>Alcaligenes</i> sp.,<br><i>B. pumilus</i>                                                                                                                    | <i>Helianthus annus</i> L.    | Root                | Positive catalase and oxidase activities, phosphate solubilization                                                         | [58] |
| 8.  | <i>Bacillus</i> sp., <i>Sphingopyxis</i> sp.                                                                                                                                                         | <i>Fragaria ananassa</i>      | Meristematic tissue | Indole acetic acid production, solubilization of inorganic phosphate                                                       | [59] |
| 9.  | <i>B. subtilis</i> OS-11                                                                                                                                                                             | <i>Ocimum sanctum</i>         | Leaves              | Increase in the content of essential oil, enhancement of plant growth                                                      | [60] |
| 10. | <i>Bacillus</i> sp. and <i>Enterobacter</i> sp.                                                                                                                                                      | <i>Phoenix dactylifera</i> L. | Seed                | ACC deaminase, IAA production, ammonia production, ferric iron chelation, solubilization of potassium, phosphorus and zinc | [61] |
| 11. | <i>Psuedomonas resinovorans</i> ,<br><i>Paenibacillus polymaxa</i> , and<br><i>Acenitobacter calcoaceticus</i>                                                                                       | <i>Gynura procumbens</i>      | Leaves              | Production of cytokinin compounds                                                                                          | [62] |
| 12. | <i>Pseudomonas</i> sp. Ph6- gfp                                                                                                                                                                      | <i>Trifolium pratense</i> L.  | Root                | Degradation of phenanthrene, a toxic                                                                                       |      |

metabolite [63]

---

|     |                                                                                                                                                                                                             |                                 |                        |                                                                                                                 |      |
|-----|-------------------------------------------------------------------------------------------------------------------------------------------------------------------------------------------------------------|---------------------------------|------------------------|-----------------------------------------------------------------------------------------------------------------|------|
| 14. | <i>Acinetobacter</i> sp. ALEB16                                                                                                                                                                             | <i>Atractylodes lancea</i>      | Leaves                 | Accumulation of plant volatile oils and induction in abscisic acid and salicylic acid production                | [64] |
| 15. | <i>Bacillus thuringiensis</i> GDB-1                                                                                                                                                                         | <i>Pinus sylvestris</i>         | Root                   | ACC deaminase activity, IAA and siderophore production along with phosphate solubilization trait                | [65] |
| 16. | <i>Bacillus subtilis</i> HYT- 12-1                                                                                                                                                                          | <i>Lycopersicum esculentum</i>  | Seed                   | IAA production; phosphate solubilization; siderophores production; nitrogen fixation and ACC deaminase activity | [66] |
| 17. | <i>Achromobacter xylosoxidans</i> strain AUM54                                                                                                                                                              | <i>Catharanthus roseus</i>      | Root                   | ACC deaminase activity, increased plant ethylene levels and increased antioxidative enzyme                      | [67] |
| 18. | <i>Bacillus megaterium</i> , <i>Bacillus pumilus</i> , <i>Bacillus licheniformis</i> , <i>Micrococcus luteus</i> , <i>Paenibacillus</i> sp., <i>Pseudomonas</i> sp., and <i>Acinetobacter calcoaceticus</i> | <i>Plectranthus tenuiflorus</i> | Root, stem, and leaves | Production of extracellular enzymes                                                                             | [68] |
| 19. | <i>Bacillus amyloliquefaciens</i> ES-2                                                                                                                                                                      | <i>Scutellaria baicalensis</i>  | Root                   | Production of secondary metabolites with broad-spectrum antibacterial and antifungal activities                 | [69] |
| 20. | <i>Serratia nematodiphila</i> LRE07, <i>Enterobacter aerogenes</i> LRE17, <i>Enterobacter</i> sp. LSE04 and                                                                                                 | <i>Solanum nigrum</i> L.        | Root, stem, and leaves | ACC deaminase, indole acetic acid, siderophore and phosphate solubilizing activity                              | [70] |

---

*Acinetobacter* sp. LSE06

|     |                                                                                                                                                                                                                                                                     |                            |                                       |                                                                                                                                                                                                                               |      |
|-----|---------------------------------------------------------------------------------------------------------------------------------------------------------------------------------------------------------------------------------------------------------------------|----------------------------|---------------------------------------|-------------------------------------------------------------------------------------------------------------------------------------------------------------------------------------------------------------------------------|------|
| 21. | <i>Acinetobacter</i> sp.,<br><i>Agrobacterium</i> sp., <i>Bacillus</i><br>sp., <i>Brevibacillus</i> sp.,<br><i>Burkholderia</i> sp.,<br><i>Curtobacterium</i> sp., <i>Erwinia</i><br>sp., <i>Lactococcus</i> sp., <i>Pantoea</i><br>sp., and <i>Pseudomonas</i> sp. | <i>Eucalyptus</i> sp.      | Stem                                  | Production of new metabolites and<br>enzymes and control of plant<br>diseases                                                                                                                                                 | [71] |
| 22. | <i>Arthrobacter</i> sp. SMR3, <i>B.</i><br><i>subtilis</i> SMR15                                                                                                                                                                                                    | <i>Papaver somniferous</i> | Root, leaves,<br>capsule and<br>seeds | Benzylisoquinoline alkaloid (BIA)<br>biosynthesis, IAA production, ACC<br>deaminase production                                                                                                                                | [72] |
| 23. | <i>Alcaligenes faecalis</i> subsp.<br><i>faecalis</i> str. S8                                                                                                                                                                                                       | <i>Withania somnifera</i>  | Stem and fruit                        | Production of IAA and phosphate<br>solubilization                                                                                                                                                                             | [73] |
| 24. | <i>B. subtilis</i> LK14                                                                                                                                                                                                                                             | <i>Moringa peregrine</i>   | Bark                                  | Phosphate solubilization, ACC<br>deaminase and acid phosphatase<br>activity                                                                                                                                                   | [74] |
| 25. | <i>Paenibacillus validus</i> ,<br><i>Lysinibacillus fusiformis</i> , <i>B.</i><br><i>licheniformis</i> , <i>Pseudomonas</i><br><i>putida</i> , <i>Microbacterium</i><br><i>oleivorans</i> , and <i>Serratia</i><br><i>plymutica</i>                                 | <i>Citrus sinensis</i>     | Root                                  | Phosphate solubilization, siderophore<br>production, nitrogen fixation, IAA<br>synthesis, production of antibiotic<br>and lytic enzymes (chitinase),<br>induction of systemic resistance<br>through salicylic acid production | [75] |
| 26. | <i>Bacillus</i> sp., <i>Pseudomonas</i> sp.                                                                                                                                                                                                                         | <i>Bauhinia purpurea</i>   | Stem, leaves<br>and flower            | Appreciable antioxidant and<br>antimicrobial activity                                                                                                                                                                         | [76] |
| 27. | <i>Acinetobacter</i> sp. ACMS25<br>and <i>Bacillus</i> sp. PVMX4                                                                                                                                                                                                    | <i>Phyllanthus amarus</i>  | Root                                  | Phosphate solubilization, IAA<br>production, siderophore production,<br>ACC deaminase activity and                                                                                                                            | [77] |

production of hydrolytic enzymes  
like cellulose, protease, pectinase

|     |                                                                                                                                                                                                                                                                 |                              |                         |                                                                                             |      |
|-----|-----------------------------------------------------------------------------------------------------------------------------------------------------------------------------------------------------------------------------------------------------------------|------------------------------|-------------------------|---------------------------------------------------------------------------------------------|------|
| 28. | <i>Azotobacter</i> sp., <i>Azotobacter vinelandii</i> , <i>Azotobacter chroococcum</i>                                                                                                                                                                          | <i>Vigna radiata</i>         | Root and leaves tissues | IAA production, phosphate solubilizing activities                                           | [78] |
| 29. | <i>Bacillus</i> sp., <i>Enterobacter</i> sp. and <i>Sporosarcina aquimarina</i>                                                                                                                                                                                 | <i>Avicennia marina</i>      | Pneumatophores          | Production of siderophore, phosphate solubilization and IAA production                      | [79] |
| 30. | <i>Pseudomonas fluorescens</i> G10 and <i>Microbacterium</i> sp. G16                                                                                                                                                                                            | <i>Brassica napus</i>        | Root                    | Production of IAA, siderophores and ACC deaminase resulting in increased biomass production | [80] |
| 31. | <i>Burkholderia phytofirmans</i>                                                                                                                                                                                                                                | <i>Allium Cepa</i>           | Root                    | ACC deaminase activity                                                                      | [81] |
| 32. | <i>Acetobacter diazotrophicus</i>                                                                                                                                                                                                                               | <i>Saccharum officinarum</i> | Stem                    | Nitrogen fixation ability                                                                   | [82] |
| 33. | <i>Bacillus subtilis</i>                                                                                                                                                                                                                                        | <i>Morus alba</i>            | Root, stem and leaves   | Reduced bacterial wilt                                                                      | [83] |
| 34. | <i>Burkholderia cepacia</i> , <i>Rhizobium</i> sp., <i>Klebsiella</i> sp., <i>Gluconacetobacter diazotrophicus</i> , <i>Herbaspirillum seropedicae</i> , <i>Pantoea agglomerans</i> , <i>Azospirillum</i> sp., <i>Bacillus</i> sp., and <i>Enterobacter</i> sp. | <i>Zea mays</i>              | -                       | Growth enhancement                                                                          | [84] |
| 35. | <i>Bacillus megaterium</i>                                                                                                                                                                                                                                      | <i>Zea mays</i>              | Root, stem and leaves   | -                                                                                           | [85] |
| 36. | <i>Burkholderia vietnamiensis</i>                                                                                                                                                                                                                               | <i>Saccharum officinarum</i> | Root                    | Growth enhancement and increased                                                            | [86] |

|     |                                                                                                                                                                                                                                                                                                                                                                                           |                              |                        | yield                                                     |                  |
|-----|-------------------------------------------------------------------------------------------------------------------------------------------------------------------------------------------------------------------------------------------------------------------------------------------------------------------------------------------------------------------------------------------|------------------------------|------------------------|-----------------------------------------------------------|------------------|
| 37. | <i>Pseudomonas</i> sp.<br><i>Gluconacetobacter diazotrophicus</i> ,<br><i>Herbaspirillum seropedicae</i> ,                                                                                                                                                                                                                                                                                | <i>Populus</i> sp.           | Root, stem and leaves  | Ability to degrade 2,4-dichlorophenoxyacetic acid (2,4-D) | [87]             |
| 38. | <i>Herbaspirillum rubrisubalbicans</i> ,<br><i>Azospirillum amazonense</i> ,<br><i>Burkholderia tropica</i><br><i>Gluconacetobacter diazotrophicus</i> , <i>H. seropedicae</i> , <i>Herbaspirillum rubrisubalbicans</i> , <i>A. amazonense</i> and <i>Burkholderia</i> sp.                                                                                                                | <i>Saccharum officinarum</i> | Root                   | -                                                         | [88]             |
| 39. | <i>Klebsiella aerogenes</i> , <i>B. subtilis</i><br><i>Sphingomonas</i> sp.,<br><i>Pseudomonas</i> sp.,<br><i>Lasiodiplodia theobromae</i> ,<br><i>Penicillium digitatum</i> ,<br><i>Aspergillus awamori</i> ,<br><i>Trichoderma harzianum</i> ,<br><i>Aspergillus flavus</i> ,<br><i>Cladosporium herbarum</i> , <i>A. niger</i> , <i>Monascus</i> sp.,<br><i>Penicillium citrinum</i> , | <i>Saccharum officinarum</i> | Root and shoot         | Growth enhancement and increased nitrogen content         | [89]             |
| 40. | <i>Bacopa monnieri</i>                                                                                                                                                                                                                                                                                                                                                                    |                              |                        | Enhancement in plant biomass and Bacoside A content       | [19]             |
| 41. | <i>Solanum nigrum</i> L.                                                                                                                                                                                                                                                                                                                                                                  |                              | Stem, leaves and fruit | -                                                         | [90, 91, 92, 93] |

and *Penicillium chrysogenum*

---

|     |                                                                                                                                                                                                                                                                                                                                                                                                                                                                                                                                                                                                                          |                              |                         |                                                           |      |
|-----|--------------------------------------------------------------------------------------------------------------------------------------------------------------------------------------------------------------------------------------------------------------------------------------------------------------------------------------------------------------------------------------------------------------------------------------------------------------------------------------------------------------------------------------------------------------------------------------------------------------------------|------------------------------|-------------------------|-----------------------------------------------------------|------|
| 43. | <i>Aspergillus</i> sp., <i>Cladosporium</i> sp.                                                                                                                                                                                                                                                                                                                                                                                                                                                                                                                                                                          | <i>Calotropis procera</i>    | Root, stem and leaves   | Antimicrobial and antioxidant activities                  | [94] |
| 44. | <i>Alternaria porri</i> , <i>Aspergillus flavipes</i> , <i>Fusarium oxysporum</i> , <i>Nigrospora sphaerica</i> , <i>A. niger</i> , <i>Curvularia lunata</i> , <i>Colletotrichum falcatum</i> , <i>Phomopsis archeri</i> , <i>Pestalotiopsis sydowiana</i> , <i>Phoma exigua</i> , and <i>Leptosphaerulina chartarum</i> <i>Delftia tsuruhatensis</i> , <i>Pseudomonas frederiksbergensis</i> , <i>Agrococcus lahaulensis</i> , <i>Arthrobacter</i> , <i>B. siamensis</i> , <i>B. tequilensis</i> , <i>B. zhangzhouensis</i> , <i>Chryseobacterium cucumeris</i> , <i>Kocuria polaris</i> and <i>Sphingomonas</i> genera | <i>Calotropis. Gigantean</i> | Stem, leaves and flower | -                                                         | [95] |
| 46. | <i>Pseudomonas</i> sp. and <i>Bacillus</i> sp.                                                                                                                                                                                                                                                                                                                                                                                                                                                                                                                                                                           | <i>Scrophularia striata</i>  | Root, stem and leaves   | Antibacterial activity against plant pathogens            | [96] |
| 47. | <i>P. aeruginosa</i> , <i>P. putida</i> , <i>B. megaterium</i> , <i>Arthrobacter</i> sp., <i>Micrococcus</i> sp.,                                                                                                                                                                                                                                                                                                                                                                                                                                                                                                        | <i>Aloe barbadensis</i>      | Root, stem and leaves   | -                                                         | [97] |
| 48. |                                                                                                                                                                                                                                                                                                                                                                                                                                                                                                                                                                                                                          | <i>Piper nigrum</i> L.       | Root and stem           | Antagonistic activity against <i>Phytophthora capsici</i> | [98] |

---

| <i>Curtobacterium</i> sp.              |                                              |                                                |                    |                                                                      |           |
|----------------------------------------|----------------------------------------------|------------------------------------------------|--------------------|----------------------------------------------------------------------|-----------|
| <i>Erwinia</i> sp., <i>Pseudomonas</i> |                                              |                                                |                    |                                                                      |           |
| sp., <i>B. megaterium</i> , <i>B.</i>  |                                              |                                                |                    |                                                                      |           |
| 49.                                    | <i>chosinensis</i> , and                     | <i>Medicago sativa</i> L.                      | Root               | -                                                                    | [99, 100] |
| <i>Microbacterium</i>                  |                                              |                                                |                    |                                                                      |           |
| <i>trichothecenolyticum</i>            |                                              |                                                |                    |                                                                      |           |
| 50.                                    | <i>B. siamensis</i>                          | <i>Coriandrum sativum</i>                      | -                  | Increased root length, shoot length,<br>and dry weight               | [101]     |
| 51.                                    | <i>Micrococcus luteus</i> and                | <i>Panax quinquefolius</i>                     | Stem               | Enhanced seedling biomass                                            | [102]     |
| <i>Lysinibacillus fusiformis</i>       |                                              |                                                |                    |                                                                      |           |
| 52.                                    | <i>Bacillus</i> and <i>Paenibacillus</i> sp. | <i>Curcuma longa</i>                           | Rhizome            | Increased root length, shoot length,<br>and root number              | [103]     |
| 53.                                    | <i>Bacillus</i> sp.                          | <i>Curcuma longa</i>                           | Rhizome            | Induced host disease resistance                                      | [104]     |
| 54.                                    | <i>Pseudomonas aeruginosa</i>                | <i>Anredera cordifolia</i>                     | Leaves             | Production of proteases, amylase,<br>esterase, and cellulose enzymes | [105]     |
| 55.                                    | <i>B. subtilis</i>                           | <i>Pseudobrickellia</i><br><i>brasiliensis</i> | Stem and<br>leaves | Protease and esterase activity                                       | [106]     |
| 57.                                    | <i>P. aeruginosa</i>                         | <i>Achyranthes aspera</i>                      | Leaves             | Improved plant biomass and<br>antioxidant activity                   | [107]     |



**Table S2.** List of endophytes enhancing pharmaceutically important secondary metabolites in medicinal plants

| S. No. | Endophyte                             | Host plant                      | Secondary plant metabolite/s | Reference |
|--------|---------------------------------------|---------------------------------|------------------------------|-----------|
| 1.     | <i>Colletotrichum gloeosporioides</i> | <i>Centella asiatica</i>        | Asiaticoside                 | [154]     |
| 2.     | <i>Fusarium</i> sp.                   | <i>Dracaena cochinchinensis</i> | Red resin                    | [155]     |
| 3.     | <i>Piriformospora indica</i>          | <i>Bacopa monnieri</i>          | Bacoside                     | [156]     |
| 4.     | <i>Phomopsis</i> sp.                  | <i>Euphorbia pekinensis</i>     | Terpenoid                    | [157]     |
| 5.     | <i>Piriformospora indica</i>          | <i>Spilanthes calva</i>         | Spilanthol                   | [158]     |
| 6.     | <i>Sebacina vermifera</i>             | <i>Linum album</i>              | Podophyllotoxins             | [159]     |
| 7.     | <i>Fusarium mairei</i>                | <i>Taxus chinensis</i>          | Paclitaxel                   | [160]     |
| 8.     | <i>Fusarium mairei</i>                | <i>Taxus cuspidate</i>          | Paclitaxel                   | [161]     |
| 9.     | Endophytic fungus                     | <i>Catharanthus roseus</i>      | Alkaloid                     | [162]     |

|       |                                                              |                                |                                       |       |
|-------|--------------------------------------------------------------|--------------------------------|---------------------------------------|-------|
| 10.   | <i>Piriformospora indica</i>                                 | <i>Curcuma longa</i>           | Curcumin and volatile oil             | [163] |
| 11.   | <i>Ramularia</i> sp.                                         | <i>Rumex gmelini</i> Turcz     | Emodin                                | [164] |
| 12.   | <i>Fusarium</i> sp.                                          | <i>Rumex gmelini</i> Turcz     | Musizin, chrysophanol and<br>physcion | [164] |
| 13.   | <i>Aspergillus oryzae</i>                                    | <i>Rumex gmelini</i> Turcz     | Resveratrol                           | [164] |
| 14.   | <i>Trimmatostroma</i> sp.                                    | <i>Rhodiola crenulata</i>      | Salidroside and tyrosol               | [165] |
| 15.   | <i>Rhizophagus intraradices</i>                              | <i>Hypericum perforatum</i> L. | Hypericin and pseudohypericin         | [166] |
| 16.   | <i>Piriformospora indica</i>                                 | <i>Withania somnifera</i>      | Withaferin A                          | [167] |
| <hr/> |                                                              |                                |                                       |       |
| 17.   | <i>CATDLF5 (Curvularia sp.) and<br/>CATDLF6 (Choanephora</i> | <i>Catharanthus roseus</i>     | Serpentine                            | [17]  |

---

*infundibulifera*)

|     |                                                                     |                                 |               |       |
|-----|---------------------------------------------------------------------|---------------------------------|---------------|-------|
| 18. | <i>CATDS5 (Pseudomonas sp.)</i>                                     | <i>Catharanthus roseus</i>      | Ajmalicine    | [17]  |
| 19. | <i>Burkholderia sp.</i>                                             | <i>Artemisia annua</i>          | Artemisinin   | [168] |
| 20. | <i>Gilmaniella sp.</i>                                              | <i>Atractylodes lancea</i>      | Ethylene      | [169] |
| 21. | <i>Chaetomium globosum &amp;<br/>Colletotrichum gloeosporioides</i> | <i>Anoectochilus roxburghii</i> | kinsenoside   | [170] |
| 22. | <i>Pseudomonas fluorescens</i>                                      | <i>Atractylodes<br/>lancea</i>  | Essential oil | [171] |
| 23. | <i>Paenibacillus polymyxa</i>                                       | <i>Panax ginseng</i>            | Ginsenoside   | [152] |

---

|     |                                                                     |                              |                                                                                                                                                                                    |       |
|-----|---------------------------------------------------------------------|------------------------------|------------------------------------------------------------------------------------------------------------------------------------------------------------------------------------|-------|
| 24. | <i>Bacillus subtilis</i>                                            | <i>Ligusticum chuanxiong</i> | ligustrazine                                                                                                                                                                       | [172] |
| 25. | <i>Pseudonocardia</i> sp.                                           | <i>Artemisia annua</i>       | Artemisinin                                                                                                                                                                        | [173] |
| 26. | <i>Burkholderia</i> sp.                                             | <i>Panax ginseng</i>         | Ginsenoside Rg3                                                                                                                                                                    | [129] |
| 27. | <i>Ilyonectria liriodendra</i>                                      | <i>Houttuynia cordata</i>    | Chlorogenic acid, quercitrin<br>$\alpha$ -pinene,<br>$\beta$ -pinene, camphene,<br>$\beta$ -myrcene, limonene, decanal,<br>bornyl acetate,<br>$\beta$ -caryophyllene, 2-undecanone | [12]  |
| 28. | Arbuscular mycorrhiza fungi (AMF)<br>and <i>Trichoderma konigii</i> | <i>Ocimum basilicum</i>      | Ferulic acid, chicoric acid,<br>and quercetin rutinoside                                                                                                                           | [174] |
| 29. | <i>Mucor fragilis</i>                                               | <i>Salvia miltiorrhiza</i>   | Diterpenoides and phenolic acids                                                                                                                                                   | [11]  |

|     |                                                            |                                                             |                                                                            |       |
|-----|------------------------------------------------------------|-------------------------------------------------------------|----------------------------------------------------------------------------|-------|
| 30. | <i>Staphylococcus sciuri</i> and<br><i>Micrococcus</i> sp. | <i>Catharanthus roseus</i>                                  | Terpenoid indole alkaloids like<br>vindoline, serpentine and<br>ajmalicine | [175] |
| 31. | Endophytic bacterial community                             | <i>Putterlickia retrospinosa</i> and<br><i>P. verrucosa</i> | Maytansine                                                                 | [176] |
| 32. | <i>Azotobacter chroococcum</i> CL13                        | <i>Curcuma longa</i>                                        | Phenolic compounds,<br>sesquiterpenoids and<br>curcuminoids                | [177] |
| 33. | <i>Stenotrophomonas maltophilia</i><br>(N5-18)             | <i>Pappaver somniferum</i>                                  | Morphine and total alkaloid                                                | [178] |
| 34. | <i>Gilmaniella</i> sp. AL12                                | <i>Atractylodes lancea</i>                                  | Volatile content                                                           | [179] |
| 35. | <i>Bradyrhizobium</i> sp.                                  | <i>Crotalaria</i>                                           | Antiherbivore, nematicide                                                  | [180] |

|     |                                                                                                                                                                            |                              |                          |       |
|-----|----------------------------------------------------------------------------------------------------------------------------------------------------------------------------|------------------------------|--------------------------|-------|
| 36. | <i>Pantoea dispersa</i> and <i>Penicillium polonicum</i>                                                                                                                   | <i>Aquilaria malaccensis</i> | Agarosirol               | [149] |
| 37. | <i>Paenibacillus</i> sp.                                                                                                                                                   | <i>Populus</i> sp.           | Threitol and asparagine  | [181] |
| 38. | <i>Enterobacter ludwigii</i>                                                                                                                                               | <i>Vitis vinifera</i>        | Vanillic acid            | [182] |
| 39. | Bacterial endophytes                                                                                                                                                       | <i>Vetiveria zizanioides</i> | Essential oil biogenesis | [151] |
| 40. | <i>Pseudomonas aeruginosa</i> and<br><i>Pseudomonas pseudoalcaligenes</i><br><br><i>Bacillus amyloliquefaciens</i> ,<br><i>Pseudomonas fluorescens</i> , <i>Alternaria</i> | <i>Hyptis suaveolens</i>     | Essential oils           | [183] |
| 41. | <i>alternata</i> , <i>Sclerotium rolfsii</i><br><br><i>Aspergillus terreus</i> , <i>Penicillium oxalicum</i> , <i>Sarocladium kiliense</i>                                 | <i>Withania somnifera</i>    | Withanolide modulation   | [184] |

---

---

|     |                                                                                                                        |                                |                                                                                                                            |            |
|-----|------------------------------------------------------------------------------------------------------------------------|--------------------------------|----------------------------------------------------------------------------------------------------------------------------|------------|
| 42. | <i>Bacillus</i> and <i>Enterobacter</i> sp.                                                                            | <i>Thymus vulgaris</i>         | Bioactive metabolites (benzene, 1,3-dimethyl-, p-xylene, dibutyl phthalate, bis (2-ethylhexyl) phthalate, and tetracosane) | [185]      |
| 43. | <i>Macrophomina pseudophaseolina</i> (SF2)                                                                             | <i>Andrographis paniculata</i> | Andrographolide content                                                                                                    | [186]      |
| 44. | <i>Fusarium redolens</i> (RF1), <i>Phialemoniopsis cornearis</i> (SF1), and <i>Macrophomina pseudophaseolina</i> (SF2) | <i>Coleus forskohlii</i>       | Forskolin content                                                                                                          | [147, 187] |
| 45. | <i>Piriformospora indica</i>                                                                                           | <i>Coleus forskohlii</i>       | p-cymene                                                                                                                   | [188]      |
| 46. | <i>Glomerella magna</i> ,                                                                                              | <i>Lycoris radiata</i>         | Alkaloides (narciclasine,                                                                                                  | [39]       |

---

|       |                                                                                                                                                                                                                                  |                            |                                          |       |
|-------|----------------------------------------------------------------------------------------------------------------------------------------------------------------------------------------------------------------------------------|----------------------------|------------------------------------------|-------|
|       | <i>Phyllosticta capitalensis</i> ,<br><i>Stagonosporopsis cucurbitacearum</i> ,<br><i>Stagonosporopsis</i><br><i>ligulicola</i> , <i>Phyllosticta</i><br><i>ophiopogonis</i> and <i>Colletotrichum</i><br><i>gloeosporioides</i> |                            | lycorine, galanthamine and<br>tazettine) |       |
| 47.   | <i>Pseudomonas fluorescens</i>                                                                                                                                                                                                   | <i>Atractylodes lancea</i> | Sesquiterpenoid                          | [189] |
| 48.   | <i>Aspergillus terreus</i> , <i>Penicillium</i><br><i>oxalicum</i> , <i>Sarocladium kiliense</i><br>(endophytes) and, <i>Trichoderma</i><br><i>viride</i> (biocontrol agent)                                                     | <i>Withania somnifera</i>  | Withaferin A                             | [190] |
| <hr/> |                                                                                                                                                                                                                                  |                            |                                          |       |
| 49.   | <i>Alcaligenes faecalis</i>                                                                                                                                                                                                      | <i>Coleus forskohlii</i>   | Forskolin                                | [186] |



|       |                                                                    |                                 |                                                                                  |            |
|-------|--------------------------------------------------------------------|---------------------------------|----------------------------------------------------------------------------------|------------|
|       | <i>Chitinophaga</i> sp., <i>Allorhizobium</i> sp.,                 |                                 |                                                                                  |            |
| 50.   | <i>Duganella</i> sp., and <i>Micromonospora</i><br>sp.             | <i>Alkanna tinctoria</i>        | Alkannin and shikonin                                                            | [16]       |
| 51.   | <i>Piriformospora indica</i>                                       | <i>Centella asiatica</i>        | Asiaticosides                                                                    | [191]      |
| 52.   | <i>Mycena</i> sp.                                                  | <i>Anoectochilus formosanus</i> | Flavonoid and kinsenoside                                                        | [153]      |
| 53.   | <i>Bacillus subtilis</i> and <i>Klebsiella</i><br><i>aerogenes</i> | <i>Bacopa monnieri</i>          | Bacoside                                                                         | [19]       |
| 54.   | <i>Paenibacillus</i> sp.                                           | <i>Bacopa monnieri</i>          | Bacoside A                                                                       | [18]       |
| <hr/> |                                                                    |                                 |                                                                                  |            |
| 55.   | Bacterial endophytes                                               | <i>Echinacea purpurea</i>       | Alkamides, volatile organic<br>compounds (VOCs) and<br>phenylpropanoid compounds | [192, 193] |
